# Supplementary material for: Predicting Short-Term Survival after Gross Total or Near Total Resection in Glioblastomas by Machine Learning-Based Radiomic Analysis of Preoperative MRI
Source: MDPI journal article supplement (doi:10.3390/cancers13205047), 2021-10-09
Supplement: s1 [file s1]

**Supplementary Table S1. The specific parameters of structural multiparametric MRI**

| MRI Sequence | TCIA                                                                                                                                                               | Dataset                                                                                |                                                                                               |
|--------------|--------------------------------------------------------------------------------------------------------------------------------------------------------------------|----------------------------------------------------------------------------------------|-----------------------------------------------------------------------------------------------|
|              |                                                                                                                                                                    | Institution 1                                                                          | Institution 2                                                                                 |
| <b>T1CE</b>  | TR/TE, 4.9–3285 ms/2.1–20 ms; slice thickness, 1–5 mm; spacing slice, 0.6–7.5 mm                                                                                   | TR/TE, 7.98 ms/2.57 ms; FOV, 220 x 220 mm; matrix, 512 x 512; slice thickness, 1 mm    | TR/TE, 6.82 ms/2.16 ms; FOV, 320 x 320 mm; matrix, 512 x 512; slice thickness, 1.6 mm         |
| <b>T1WI</b>  | TR/TE, 352–3379 ms/2.75–19 ms; slice thickness, 1–5 mm; spacing slice, 2–7.5 mm.                                                                                   | TR/TE, 5.98 ms/1.83 ms; FOV, 220 x 220 mm; matrix, 512 x 512; slice thickness, 1.6 mm  | TR/TE, 680 ms/7.63 ms; FOV, 320 x 320 mm; matrix, 512 x 512; slice thickness, 5 mm            |
| <b>T2WI</b>  | TR/TE, 700–6370 ms/15–120 ms; slice thickness, 1.5–5 mm; spacing slice, 1.5–7.5 mm                                                                                 | TR/TE, 5220 ms/96.12 ms; FOV, 220 x 220 mm; matrix, 512 x 512; slice thickness, 5 mm.  | TR/TE, 4322 ms/124.25 ms; FOV, 256 x 256 mm; matrix, 512 x 512; slice thickness, 4.4 mm       |
| <b>FLAIR</b> | TR/TE, 6000–11,000 ms/34.6–155 ms; slice thickness, 2.5–5 mm; spacing slice, 2–7.5 mm. The matrix size of all the MRI sequences was either 256 x 256 or 512 x 512. | TR/TE, 11000 ms/142.43 ms; FOV, 220 x 220 mm; matrix, 512 x 512; slice thickness, 4 mm | FLAIR : TR/TE, 9350 ms/142.56 ms; FOV, 320 x 224 mm; matrix, 512 x 512; slice thickness, 4 mm |

TCIA = The Cancer Image Archive, T1WI = T1-weighted image, T1CE = contrast-enhanced T1WI, T2WI= T2-weighted image, FLAIR = Fluid-attenuated inversion recovery, TR = repetition time, TE= echo time, FOV = field of view.

| <b>Supplementary Table S2. Radiomic features description</b>            |                                                                                                                                                                                  |
|-------------------------------------------------------------------------|----------------------------------------------------------------------------------------------------------------------------------------------------------------------------------|
| <b>Feature Family</b>                                                   | <b>Specific Features</b>                                                                                                                                                         |
| <b>Intensity Features<br/>(First-Order Statistics)</b>                  | Minimum<br>Maximum<br>Mean<br>Standard Deviation<br>Variance<br>Skewness<br>Kurtosis                                                                                             |
| <b>Histogram -based</b>                                                 | Bin Frequency                                                                                                                                                                    |
| <b>Volumetric</b>                                                       | Volume/ Area                                                                                                                                                                     |
| <b>Morphologic</b>                                                      | Elongation<br>Perimeter<br>Roundness<br>Eccentricity<br>Ellipse Diameter<br>Equivalent Spherical Radius                                                                          |
| <b>Grey Level<br/>Co-occurrence<br/>Matrix<br/>(GLCM)</b>               | Energy (Angular Second Moment)<br>Contrast (Inertia)<br>Joint Entropy<br>Homogeneity (Inverse Difference Moment)<br>Correlation<br>Variance<br>SumAverage<br>Auto<br>Correlation |
| <b>Grey Level<br/>Run-Length<br/>Matrix<br/>(GLRLM)</b>                 | SRE<br>LRE<br>GLN<br>RLN<br>LGRE<br>HGRE<br>SRLGE<br>SRHGE<br>LRLGE<br>LRHGE                                                                                                     |
| <b>Neighborhood<br/>Grey-Tone<br/>Difference<br/>Matrix<br/>(NGTDM)</b> | Coarseness<br>Contrast<br>Busyness<br>Complexity<br>Strength                                                                                                                     |
| <b>Grey Level<br/>Size-Zone<br/>Matrix<br/>(GLSZM)</b>                  | SZE<br>LZE<br>GLN<br>ZSN<br>ZP<br>LGZE<br>HGZE<br>SZLGE<br>SZHGE<br>LZLGE                                                                                                        |

|                       |                   |
|-----------------------|-------------------|
|                       | LZHGE             |
|                       | GLV               |
|                       | ZLV               |
| <b>Lattice -based</b> | Selected features |
|                       | Feature Maps      |

**Supplementary Table S3. Hyperparameters of machine learning classifiers used in this study.**

| <b>Classifier</b>          | <b>Hyperparameters</b>                                                                                                                                         |
|----------------------------|----------------------------------------------------------------------------------------------------------------------------------------------------------------|
| <b>SVM</b>                 | Cost = 1.0; Regression loss epsilon = 0.10; Kernel = linear; Numerical tolerance = 0.0010; Iteration limit = 100                                               |
| <b>kNN</b>                 | Number of neighbors = 5; Metric = Euclidean; Weight = uniform                                                                                                  |
| <b>Random Forest</b>       | Number of trees = 5; Replicable training = yes; Attributes at each split = 5; Limit depth of individual trees = 3.                                             |
| <b>Logistic regression</b> | Regularization type = LASSO (L1)                                                                                                                               |
| <b>Naïve Bayes</b>         | Type = Gaussian, Priors = None; Variable smoothing = 1e-9                                                                                                      |
| <b>Neural Network</b>      | Neurons in hidden layers = 100; Activation = ReLu; Solver = Adam; Regularization alpha = 0.001; Maximal number of iterations = 200; Replicable training = yes. |

SVM = Support Vector Machine, kNN = k-Nearest Neighbor, LASSO = Least Absolute Shrinkage and Selection Operator.

**Supplementary Table S4. Model performance grouped by feature selection filter and machine learning classifier on training dataset**

| <b>Classifier</b>             | <b>Filter</b>    | <b>AUC</b> | <b>CA</b> | <b>Precision</b> | <b>F1</b> |
|-------------------------------|------------------|------------|-----------|------------------|-----------|
| <b>Naive Bayes</b>            | Information Gain | 0.884      | 0.818     | 0.883            | 0.837     |
|                               | Gini Index       | 0.886      | 0.825     | 0.877            | 0.842     |
|                               | FCBF             | 0.885      | 0.804     | 0.879            | 0.826     |
| <b>k-Nearest Neighbor</b>     | Information Gain | 0.925      | 0.902     | 0.902            | 0.886     |
|                               | Gini Index       | 0.929      | 0.895     | 0.895            | 0.876     |
|                               | FCBF             | 0.904      | 0.902     | 0.895            | 0.893     |
| <b>Neural Network</b>         | Information Gain | 0.906      | 0.902     | 0.912            | 0.882     |
|                               | Gini Index       | 0.911      | 0.909     | 0.918            | 0.892     |
|                               | FCBF             | 0.894      | 0.902     | 0.897            | 0.890     |
| <b>Random Forest</b>          | Information Gain | 0.978      | 0.944     | 0.948            | 0.939     |
|                               | Gini Index       | 0.985      | 0.972     | 0.973            | 0.971     |
|                               | FCBF             | 0.983      | 0.937     | 0.937            | 0.932     |
| <b>Support Vector Machine</b> | Information Gain | 0.802      | 0.853     | 0.828            | 0.803     |
|                               | Gini Index       | 0.817      | 0.867     | 0.885            | 0.821     |
|                               | FCBF             | 0.842      | 0.860     | 0.846            | 0.817     |
| <b>Logistic Regression</b>    | Information Gain | 0.823      | 0.839     | 0.715            | 0.772     |
|                               | Gini Index       | 0.823      | 0.846     | 0.797            | 0.788     |
|                               | FCBF             | 0.853      | 0.839     | 0.715            | 0.772     |

AUC: area under the curve; CA: classification accuracy; FCBC: fast correlation based filter.

**Supplementary Table S5. Kaplan-Meier analysis based on Random Forest Survival risk groups**

| Sample              | OOB-CHF<br>Cutpoint | Risk groups and number of<br>cases | Median OS<br>(IQR)<br>days | Log-rank<br>Test |        |
|---------------------|---------------------|------------------------------------|----------------------------|------------------|--------|
|                     |                     |                                    |                            | $\chi^2$         | $p$    |
| Training<br>dataset | 0.6836856           | Low = 86                           | 466 (283)                  | 19.9             | < .001 |
|                     |                     | High = 57                          | 331 (236)                  |                  |        |
| Testing<br>dataset  | 0.6836856           | Low = 43                           | 486 (314)                  | 7                | .008   |
|                     |                     | High = 17                          | 155 (236)                  |                  |        |

OS= Overall survival. IQR= interquartile range, OOB-CHF = out of bag cumulative hazard function.

| <b>Supplementary Table S6. Methodologic quality evaluation of our study by the Radiomic Quality Score</b> |                     |
|-----------------------------------------------------------------------------------------------------------|---------------------|
| Scoring item                                                                                              | Points              |
| Image protocol quality                                                                                    | 1                   |
| Multiple segmentations                                                                                    | 1                   |
| Phantom study on all scanners                                                                             | 0                   |
| Imaging at multiple time points                                                                           | 0                   |
| Feature reduction or adjustment for multiple testing                                                      | 3                   |
| Multivariate analysis with nonradiomic features                                                           | 1                   |
| Detect and discuss biologic correlates                                                                    | 0                   |
| Cutoff analysis                                                                                           | 1                   |
| Discrimination statistics                                                                                 | 2                   |
| Calibration statistics                                                                                    | 1                   |
| Prospective study registered in trial data base                                                           | 0                   |
| Validation                                                                                                | 5                   |
| Comparison with criterion standard                                                                        | 0                   |
| Potential clinical utility                                                                                | 2                   |
| Cost-effectiveness analysis                                                                               | 0                   |
| Open science and data                                                                                     | 2                   |
| <b>Total points</b>                                                                                       | <b>19/36 (53 %)</b> |

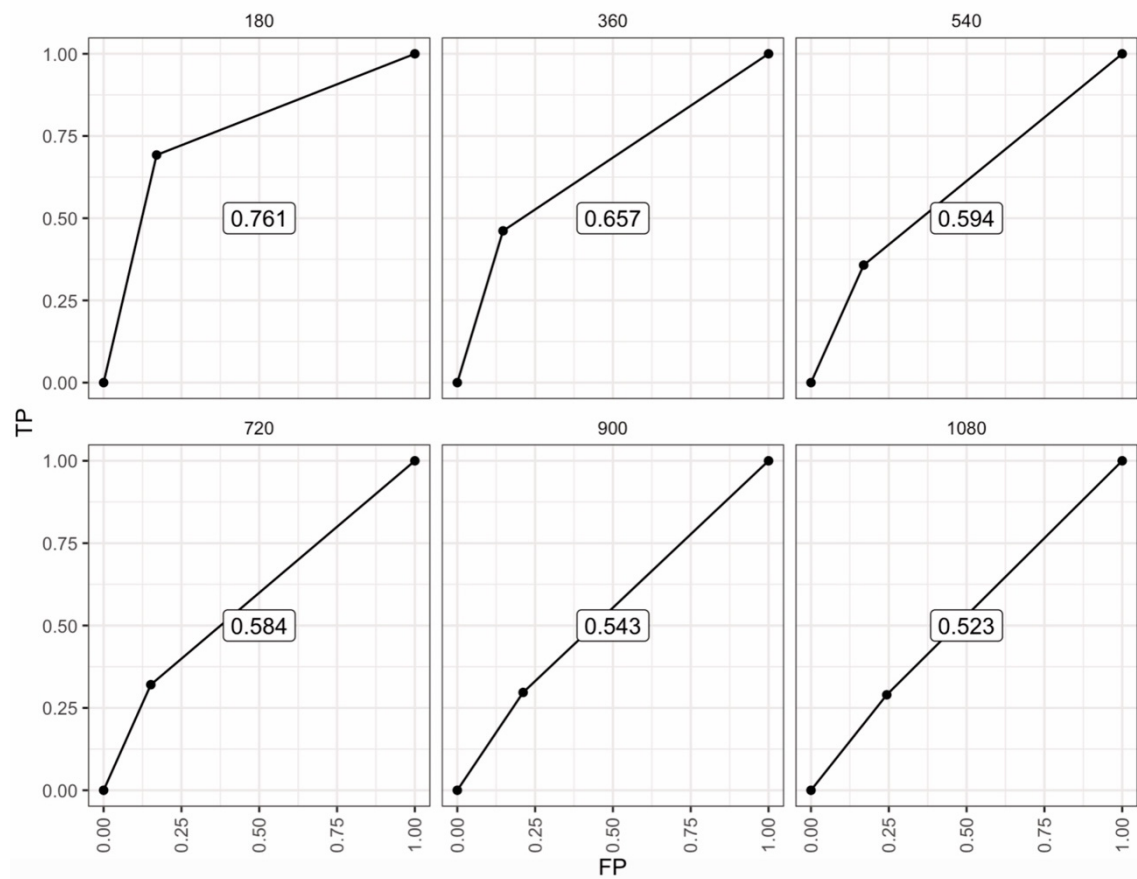

**Supplementary Figure S1.** Time-dependent receiver operating characteristics (ROC) curve of the Random Survival Forest survival model in the testing data set. Time in days appears at the top of each panel. TP = true positives, FP = False positives.
